# Supplementary material
Source: MDPI journal article supplement (https://www.mdpi.com/2311-7524/8/6/522)
Supplement: s1 [file s1]

Supplementary Table S1. The qPCR primers for LAC genes of turnip and Chinese cabbage

| Primers    | Sequences                 |
|------------|---------------------------|
| qLAC1-F    | CTCCGCATAATCAACGCTGC      |
| qLAC1-R    | CGTCGACTTCGACTACGGTT      |
| qLAC2-F    | TACAACCGTCGCAGGGATTC      |
| qLAC2-R    | TCGCTGCATAGCTCGTACTG      |
| qLAC3.1-F  | GCCTACTTCGCTTTTCTCGC      |
| qLAC3.1-R  | TTACGCAGCACAAATTCACGG     |
| qLAC3.2-F  | CTCCAGCGACTCTCCTTTGT      |
| qLAC3.2-R  | TTCCTTAGCACAAATTCACGGA    |
| qLAC4.1-F  | CCACCTTTTCACGGTGGTTG      |
| qLAC4.1-R  | GACCGGGGGCTATAACGATG      |
| qLAC4.2-F  | GGAGAGCCATCCTACGCATC      |
| qLAC4.2-R  | TCCATCCAGCAGTAGGGACA      |
| qLAC4.3-F  | CAAACCGTTCAAGACCGACAC     |
| qLAC4.3-R  | GGTGGTTAGGAGGACGTTGG      |
| qLAC5.1-F  | GGGCCGTTATCAGATTTGTCG     |
| qLAC5.1-R  | CAATGCATTATCCAAACCCCA     |
| qLAC5.2-F  | GCGGTCCTTCTTCTTCACTT      |
| qLAC5.2-R  | TGGTGTGCTCTGTTGGCTTC      |
| qLAC6-F    | AGCGCCAAGGAAGACATACC      |
| qLAC6-R    | GTTTGGTGTACTCGCCGTCT      |
| qLAC7-F    | TCCAAAGACATCTACACCAAACCT  |
| qLAC7-R    | GTGAGCCGCCATGTAGTAGG      |
| qLAC8.1-F  | GATCTGGTCGTCCCTACCCT      |
| qLAC8.1-R  | GGCGAGGCCATTTATGAGGA      |
| qLAC8.2-F  | ACGGCTGACCAGCCCAA         |
| qLAC8.2-R  | TGCTGTGACTTGGCATCCT       |
| qLAC9-F    | ATGACTTCCCCGACCAACCT      |
| qLAC9-R    | AGACTCTGTACGGACGCTGAA     |
| qLAC10-F   | ATTAGCGGTAGAGAGCGGGA      |
| qLAC10-R   | TCGGTGGTGAAGGGTTTGAC      |
| qLAC11.1-F | GGTCTAAAGATGGCTTTCGTTGTT  |
| qLAC11.1-R | GTCCTTGGGCGGTGGTAGA       |
| qLAC11.2-F | CGACATGTGTGAACGGGACA      |
| qLAC11.2-R | AGGCGGTCTATCAGGGAAGT      |
| qLAC12.1-F | CCATAGTGATTAATATGCATGGTGT |
| qLAC12.1-R | CCTTCTTGGCCTTGGATCGT      |
| qLAC12.2-F | CAGGCATGGTGTGAGGC         |
| qLAC12.2-R | TGTGTAGCTCTTCCGGGTC       |
| qLAC12.3-F | TTCCATGGCAGAAGCCAACA      |
| qLAC12.3-R | CACCGTGCCGTACGATGAA       |
| qLAC13-F   | CTGATGCACTGCCACATCG       |

|            |                      |
|------------|----------------------|
| qLAC13-R   | CAAGTGCCCTTCACCGTTCT |
| qLAC14-F   | CCACCCGGTTCACTAACCAA |
| qLAC14-R   | AACCGGACGGTTACTGGTTC |
| qLAC15.1-F | AACGCTACCCAAACCTTCCT |
| qLAC15.1-R | GCGAGATCTTCACGGGAACT |
| qLAC15.2-F | CGGAGAAGCGGTTGAAATGG |
| qLAC15.2-R | AAATGCATGGGGTGGTCGAT |
| qLAC16.1-F | AACCGTTCAAGACCGACACC |
| qLAC16.1-R | GGTTAGGAGGACGTTGGTGG |
| qLAC16.2-F | AAATCGGACGTGGAGCAACT |
| qLAC16.2-R | ATTAGAGATGGGGCCGGAGT |
| qLAC17.1-F | CGGTGGGGTTGGGGACTAA  |
| qLAC17.1-R | AGGAGAGCCTTCGTTGGTAG |
| qLAC17.2-F | GGATTGGGAACAAACCTTGC |
| qLAC17.2-R | AGAGCCTTTGTTGGCATCGT |
| qLAC17.3-F | GAACCTTCGCTCTTCGCAC  |
| qLAC17.3-R | GGCACGTTAGCTGGGAATCT |
| qLAC22-F   | TAACGGCAAGTTCCCTGGAC |
| qLAC22-R   | TAGCTGACGCTGTTGGTGAG |
| qTUB-F     | ACCGTCTCGTCTCTCAGGTT |
| qTUB-R     | AGATGACTGGGGCGTAGGAT |
